# Supplementary material
Source: MDPI journal article supplement (https://www.mdpi.com/2312-7481/7/9/125)
Supplement: s1 [file s1]

# Supplementary Materials: Low-Coordinate Dinuclear Dysprosium(III) Single Molecule Magnets Utilizing LiCl as Bridging Moieties and tris(amido)amine as Blocking Ligands

Maria Brzozowska, Gabriela Handzlik, Mikolaj Zychowicz and Dawid Pinkowicz \*

Faculty of Chemistry, Jagiellonian University, Gronostajowa 2, 30-387 Kraków, Poland;  
 maria.brzozowska@student.uj.edu.pl (M.B.); gabriela.handzlik@uj.edu.pl (G.H.);  
 mikolaj.zychowicz@doctoral.uj.edu.pl (M.Z.)

\* Correspondence: dawid.pinkowicz@uj.edu.pl

**Table S1.** Description and contractions of the basis sets (two models: S - smaller, L - larger) employed in *ab initio* calculations of the Dy<sup>III</sup> crystal field.

| Basis set "S"              | Basis set "L"                                                                      |
|----------------------------|------------------------------------------------------------------------------------|
| Dy.ANO-RCC-VDZP 7S6P4D2F1G | Dy.ANO-RCC-VTZP 8S7P5D3F2G1H                                                       |
| N.ANO-RCC-VDZ 3S2P         | N.ANO-RCC-VDZP 3S2P1D (first coordination sphere)<br>N.ANO-RCC-VDZ 3S2P (others)   |
| O.ANO-RCC-VDZ 3S2P         | O.ANO-RCC-VDZP 3S2P1D (first coordination sphere)<br>O.ANO-RCC-VDZ 3S2P (others)   |
| C.ANO-RCC-VDZ 3S2P         | C.ANO-RCC-VDZ 3S2P                                                                 |
| H.ANO-RCC-VDZ 2S           | H.ANO-RCC-VDZ 2S                                                                   |
| Li.ANO-RCC-VDZ 3S2P        | Li.ANO-RCC-VDZ 3S2P                                                                |
| Si.ANO-RCC-VDZ 4S3P        | Si.ANO-RCC-VDZ 4S3P                                                                |
| Cl.ANO-RCC-VDZ 4S3P        | Cl.ANO-RCC-VDZP 4S3P1D (first coordination sphere)<br>Cl.ANO-RCC-VDZ 4S3P (others) |
| Y.ANO-RCC-VDZ 6S5P3D       | Y.ANO-RCC-VDZ 6S5P3D                                                               |

**Table S2.** Summary of the energy splitting of the <sup>6</sup>H<sub>15/2</sub> multiplet of the Dy1A in models: L, S with pseudo-g-tensors of each Kramers doublet and composition in the |m<sub>J</sub>⟩ basis of ground state.

| Dy1A                                                                                                                      |                            |                |                |                           |                            |                |                |
|---------------------------------------------------------------------------------------------------------------------------|----------------------------|----------------|----------------|---------------------------|----------------------------|----------------|----------------|
| S                                                                                                                         |                            |                |                | L                         |                            |                |                |
| Energy and Pseudo-g-tensor components<br>(g <sub>x</sub> , g <sub>y</sub> , g <sub>z</sub> ) of 8 ground Kramers doublets |                            |                |                |                           |                            |                |                |
| Energy / cm <sup>-1</sup>                                                                                                 | Pseudo-g-tensor components |                |                | Energy / cm <sup>-1</sup> | Pseudo-g-tensor components |                |                |
|                                                                                                                           | g <sub>x</sub>             | g <sub>y</sub> | g <sub>z</sub> |                           | g <sub>x</sub>             | g <sub>y</sub> | g <sub>z</sub> |
| 0.000                                                                                                                     | 0.0356                     | 0.0767         | 19.0362        | 0.000                     | 0.0282                     | 0.0585         | 19.1373        |
| 124.009                                                                                                                   | 0.3035                     | 0.3625         | 15.8555        | 134.526                   | 0.2553                     | 0.3123         | 15.9039        |
| 253.409                                                                                                                   | 1.4756                     | 1.7296         | 13.2025        | 265.345                   | 1.2463                     | 1.4956         | 13.3187        |
| 357.379                                                                                                                   | 3.2102                     | 4.5264         | 10.2251        | 364.811                   | 2.8686                     | 4.0283         | 10.7887        |

|                                                                                                                                                                                       |        |        |         |                       |        |        |         |
|---------------------------------------------------------------------------------------------------------------------------------------------------------------------------------------|--------|--------|---------|-----------------------|--------|--------|---------|
| 451.222                                                                                                                                                                               | 3.2026 | 4.1248 | 10.9229 | 451.974               | 3.5257 | 4.4375 | 10.7066 |
| 566.117                                                                                                                                                                               | 1.2060 | 1.4777 | 13.9296 | 562.193               | 1.4393 | 1.6907 | 13.9177 |
| 698.965                                                                                                                                                                               | 0.3354 | 0.3998 | 16.3988 | 697.537               | 0.2709 | 0.4738 | 16.0279 |
| 788.316                                                                                                                                                                               | 0.0794 | 0.1930 | 19.1586 | 771.161               | 0.1225 | 0.3402 | 18.778  |
| <b>Composition of the ground Kramers doublet in the <math> m_j\rangle</math> basis on the quantization axis within <math>J = 15/2</math> manifold (only contributions above 0.1%)</b> |        |        |         |                       |        |        |         |
| 82.7% $ +15/2\rangle$                                                                                                                                                                 |        |        |         | 87.4% $ +15/2\rangle$ |        |        |         |
| 11.8% $ +11/2\rangle$                                                                                                                                                                 |        |        |         | 11.1% $ +11/2\rangle$ |        |        |         |
| 3.2% $ +15/2\rangle$                                                                                                                                                                  |        |        |         | 0.8% $ +7/2\rangle$   |        |        |         |
| 1.0% $ +7/2\rangle$                                                                                                                                                                   |        |        |         | 0.3% $ +9/2\rangle$   |        |        |         |
| 0.5% $ +11/2\rangle$                                                                                                                                                                  |        |        |         | 0.2% $ +13/2\rangle$  |        |        |         |
| 0.3% $ +9/2\rangle$                                                                                                                                                                   |        |        |         |                       |        |        |         |
| 0.3% $ +13/2\rangle$                                                                                                                                                                  |        |        |         |                       |        |        |         |

**Table S3.** Summary of the energy splitting of the  $^6\text{H}_{15/2}$  multiplet of the Dy1B in models: L, S with pseudo-g-tensors of each Kramers doublet and composition in the  $|m_j\rangle$  basis of ground state.

| Dy1B                                                                                                                                                          |                            |                |                |                           |                            |                |                |
|---------------------------------------------------------------------------------------------------------------------------------------------------------------|----------------------------|----------------|----------------|---------------------------|----------------------------|----------------|----------------|
| S                                                                                                                                                             |                            |                |                | L                         |                            |                |                |
| Energy and Pseudo-g-tensor components<br>(g <sub>x</sub> , g <sub>y</sub> , g <sub>z</sub> ) of 8 ground Kramers doublets                                     |                            |                |                |                           |                            |                |                |
| Energy / cm <sup>-1</sup>                                                                                                                                     | Pseudo-g-tensor components |                |                | Energy / cm <sup>-1</sup> | Pseudo-g-tensor components |                |                |
|                                                                                                                                                               | g <sub>x</sub>             | g <sub>y</sub> | g <sub>z</sub> |                           | g <sub>x</sub>             | g <sub>y</sub> | g <sub>z</sub> |
| 0.000                                                                                                                                                         | 0.0356                     | 0.0762         | 19.0682        | 0.000                     | 0.0279                     | 0.0573         | 19.1709        |
| 121.383                                                                                                                                                       | 0.3313                     | 0.3984         | 16.0509        | 133.544                   | 0.2873                     | 0.3620         | 16.0444        |
| 242.221                                                                                                                                                       | 1.5270                     | 1.7894         | 13.1814        | 255.379                   | 1.3586                     | 1.6178         | 13.2410        |
| 342.243                                                                                                                                                       | 3.0786                     | 4.5987         | 10.3340        | 350.990                   | 2.8127                     | 4.2071         | 10.8107        |
| 429.902                                                                                                                                                       | 3.0786                     | 4.1894         | 11.0697        | 432.177                   | 3.3182                     | 4.3954         | 10.9957        |
| 536.231                                                                                                                                                       | 1.2583                     | 1.6053         | 13.7579        | 535.078                   | 1.4303                     | 1.7630         | 13.8052        |
| 654.832                                                                                                                                                       | 0.4063                     | 0.4660         | 16.7362        | 658.831                   | 0.3844                     | 0.4847         | 16.2977        |
| 757.531                                                                                                                                                       | 0.0604                     | 0.1354         | 19.3847        | 738.753                   | 0.1045                     | 0.2723         | 19.0061        |
| Composition of the ground Kramers doublet in the  m <sub>J</sub> ⟩ basis on the quantization axis within J = 15/2 manifold<br>(only contributions above 0.1%) |                            |                |                |                           |                            |                |                |
| 74.1%   + 15/2⟩                                                                                                                                               |                            |                |                | 76.8%   + 15/2⟩           |                            |                |                |
| 12.7%   − 15/2⟩                                                                                                                                               |                            |                |                | 11.5%   − 15/2⟩           |                            |                |                |
| 9.3%   + 11/2⟩                                                                                                                                                |                            |                |                | 8.5%   + 11/2⟩            |                            |                |                |
| 1.6%   − 11/2⟩                                                                                                                                                |                            |                |                | 1.3%   − 11/2⟩            |                            |                |                |
| 0.9%   + 7/2⟩                                                                                                                                                 |                            |                |                | 0.8%   + 7/2⟩             |                            |                |                |
| 0.5%   + 9/2⟩                                                                                                                                                 |                            |                |                | 0.5%   + 9/2⟩             |                            |                |                |
| 0.3%   + 13/2⟩                                                                                                                                                |                            |                |                | 0.3%   + 13/2⟩            |                            |                |                |
| 0.2%   − 7/2⟩                                                                                                                                                 |                            |                |                |                           |                            |                |                |
